# Supplementary material
Source: MDPI journal article supplement (https://www.mdpi.com/2071-1050/16/10/4013)
Supplement: s1 [file s1]

## Supplementary Information

# Life Cycle Assessment of Wheat Straw Pyrolysis with Volatile Fractions Chemical Looping Combustion

Teresa Mendiara<sup>1</sup>, Alberto Navajas<sup>2,3\*</sup>, Alberto Abad<sup>1</sup>, Tobias Pröll<sup>4</sup>, Mikel Munárriz<sup>2</sup>, Luis M. Gandía<sup>2,3</sup>, Francisco García-Labiano<sup>1</sup>, Luis F. de Diego<sup>1</sup>

<sup>1</sup> Department of Energy and Environment, Instituto de Carboquímica-ICB-CSIC, Miguel Luesma Castán 4, 50018 Zaragoza, Spain

<sup>2</sup> Department of Science, Public University of Navarre, Arrosadía Campus s/n, 31006 Pamplona, Spain

<sup>3</sup> Institute for Advanced Materials and Mathematics (InaMat<sup>2</sup>), Public University of Navarre, Arrosadía Campus s/n, 31006 Pamplona, Spain

<sup>4</sup> Institute for Chemical and Energy Engineering, University of Natural Resources and Life Sciences, 1190 Vienna, Austria

**Table S1.** Numerical values of the EIIs for the processes of the Case I.

|             | <b>Wheat<br/>Straw<br/>production</b> | <b>CO2 biochar<br/>secuestration</b> | <b>Syngas<br/>combustion</b> | <b>Bio-oil<br/>combustion</b> | <b>CH4<br/>thermal<br/>energy<br/>equivalence</b> | <b>TOTAL</b> |
|-------------|---------------------------------------|--------------------------------------|------------------------------|-------------------------------|---------------------------------------------------|--------------|
| <b>GWP</b>  | 1.65E-01                              | -8.22E-01                            | 9.55E-01                     | 1.62E-01                      | -6.34E-01                                         | -1.76E-01    |
| <b>ODP</b>  | 2.44E-13                              | 0.00E+00                             | 1.16E-11                     | 1.50E-12                      | -1.97E-14                                         | 1.33E-11     |
| <b>RI</b>   | 1.09E-08                              | 0.00E+00                             | 1.32E-08                     | 2.25E-09                      | -4.40E-09                                         | 2.19E-08     |
| <b>IR</b>   | 4.68E-03                              | 0.00E+00                             | 1.78E-04                     | 2.32E-05                      | -4.62E-04                                         | 4.42E-03     |
| <b>POF</b>  | 1.91E-04                              | 0.00E+00                             | 8.07E-03                     | 1.38E-03                      | -5.70E-04                                         | 9.07E-03     |
| <b>AC</b>   | 1.22E-03                              | 0.00E+00                             | 5.98E-03                     | 1.02E-03                      | -4.57E-04                                         | 7.77E-03     |
| <b>EUT</b>  | 5.49E-03                              | 0.00E+00                             | 3.44E-02                     | 5.88E-03                      | -2.06E-03                                         | 4.37E-02     |
| <b>EUF</b>  | 4.25E-05                              | 0.00E+00                             | 7.73E-09                     | 1.01E-09                      | -2.29E-08                                         | 4.25E-05     |
| <b>EUM</b>  | 5.78E-03                              | 0.00E+00                             | 3.14E-03                     | 5.37E-04                      | -1.86E-04                                         | 9.27E-03     |
| <b>HTC</b>  | 7.83E-10                              | 0.00E+00                             | 3.55E-11                     | 4.61E-12                      | -5.90E-11                                         | 7.64E-10     |
| <b>HTNC</b> | 3.73E-08                              | 0.00E+00                             | 1.55E-10                     | 2.01E-11                      | -1.12E-09                                         | 3.63E-08     |
| <b>ECFW</b> | 1.06E+00                              | 0.00E+00                             | 1.54E-02                     | 2.01E-03                      | -1.78E-01                                         | 8.98E-01     |
| <b>LU</b>   | 8.70E+01                              | 0.00E+00                             | 1.98E-02                     | 2.58E-03                      | -1.88E-02                                         | 8.70E+01     |
| <b>RDM</b>  | 1.20E-08                              | 0.00E+00                             | 6.76E-08                     | 8.80E-09                      | -7.60E-09                                         | 8.08E-08     |
| <b>WU</b>   | 1.74E+01                              | 0.00E+00                             | 1.48E-01                     | 1.93E-02                      | -1.69E-03                                         | 1.76E+01     |
| <b>RU</b>   | 1.09E+00                              | 0.00E+00                             | 4.99E-02                     | 6.49E-03                      | -1.02E+01                                         | -9.01E+00    |

**Table S2.** Numerical values of the EIIs for the processes of the case II.

|             | Wheat<br>Straw<br>production | CO2 biochar<br>sequestration | Syngas CLC<br>combustion | Bio-oil<br>combustion | CH4<br>thermal<br>energy<br>equivalence | CO2<br>transport<br>and<br>injection | TOTAL     |
|-------------|------------------------------|------------------------------|--------------------------|-----------------------|-----------------------------------------|--------------------------------------|-----------|
| <b>GWP</b>  | 1.65E-01                     | -8.22E-01                    | 4.11E-03                 | 1.62E-01              | -6.03E-01                               | -9.42E-01                            | -2.04E+00 |
| <b>ODP</b>  | 2.44E-13                     | 0.00E+00                     | 1.01E-11                 | 1.50E-12              | -1.87E-14                               | 1.72E-16                             | 1.18E-11  |
| <b>RI</b>   | 1.09E-08                     | 0.00E+00                     | 2.72E-10                 | 2.25E-09              | -4.18E-09                               | 4.13E-11                             | 9.24E-09  |
| <b>IR</b>   | 4.68E-03                     | 0.00E+00                     | 1.58E-04                 | 2.32E-05              | -4.39E-04                               | 4.27E-06                             | 4.42E-03  |
| <b>POF</b>  | 1.91E-04                     | 0.00E+00                     | 2.06E-05                 | 1.38E-03              | -5.42E-04                               | 5.36E-06                             | 1.06E-03  |
| <b>AC</b>   | 1.22E-03                     | 0.00E+00                     | 2.34E-05                 | 1.02E-03              | -4.34E-04                               | 4.29E-06                             | 1.84E-03  |
| <b>EUT</b>  | 5.49E-03                     | 0.00E+00                     | 8.03E-05                 | 5.88E-03              | -1.95E-03                               | 1.93E-05                             | 9.52E-03  |
| <b>EUF</b>  | 4.25E-05                     | 0.00E+00                     | 6.80E-09                 | 1.01E-09              | -2.18E-08                               | 2.12E-10                             | 4.25E-05  |
| <b>EUM</b>  | 5.78E-03                     | 0.00E+00                     | 7.42E-06                 | 5.37E-04              | -1.77E-04                               | 1.74E-06                             | 6.15E-03  |
| <b>HTC</b>  | 7.83E-10                     | 0.00E+00                     | 3.10E-11                 | 4.61E-12              | -5.61E-11                               | 5.54E-13                             | 7.63E-10  |
| <b>HTNC</b> | 3.73E-08                     | 0.00E+00                     | 1.36E-10                 | 2.01E-11              | -1.07E-09                               | 1.05E-11                             | 3.64E-08  |
| <b>ECFW</b> | 1.06E+00                     | 0.00E+00                     | 1.36E-02                 | 2.01E-03              | -1.69E-01                               | 1.67E-03                             | 9.07E-01  |
| <b>LU</b>   | 8.70E+01                     | 0.00E+00                     | 1.74E-02                 | 2.58E-03              | -1.79E-02                               | 1.72E-04                             | 8.70E+01  |
| <b>RDM</b>  | 1.20E-08                     | 0.00E+00                     | 6.54E-08                 | 8.80E-09              | -7.23E-09                               | 7.11E-11                             | 7.90E-08  |
| <b>WU</b>   | 1.74E+01                     | 0.00E+00                     | 1.30E-01                 | 1.93E-02              | -1.61E-03                               | 8.06E-04                             | 1.75E+01  |
| <b>RU</b>   | 1.09E+00                     | 0.00E+00                     | 4.48E-02                 | 6.49E-03              | -9.66E+00                               | 9.55E-02                             | -8.43E+00 |

**Table S3.** Numerical values of the EIIs for the processes of the case III.

|             | <b>Wheat<br/>Straw<br/>production</b> | <b>CO2 biochar<br/>sequestration</b> | <b>Volatiles<br/>CLC<br/>combustion</b> | <b>CH4<br/>thermal<br/>energy<br/>equivalence</b> | <b>CO2<br/>transport<br/>and<br/>injection</b> | <b>TOTAL</b> |
|-------------|---------------------------------------|--------------------------------------|-----------------------------------------|---------------------------------------------------|------------------------------------------------|--------------|
| <b>GWP</b>  | 1.65E-01                              | -8.22E-01                            | 4.64E-03                                | -6.00E-01                                         | -1.09E+00                                      | -2.34E+00    |
| <b>ODP</b>  | 2.44E-13                              | 0.00E+00                             | 1.14E-11                                | -1.86E-14                                         | 1.99E-16                                       | 1.16E-11     |
| <b>RI</b>   | 1.09E-08                              | 0.00E+00                             | 3.06E-10                                | -4.15E-09                                         | 4.78E-11                                       | 7.06E-09     |
| <b>IR</b>   | 4.68E-03                              | 0.00E+00                             | 1.78E-04                                | -4.36E-04                                         | 4.95E-06                                       | 4.42E-03     |
| <b>POF</b>  | 1.91E-04                              | 0.00E+00                             | 2.29E-05                                | -5.39E-04                                         | 6.20E-06                                       | -3.19E-04    |
| <b>AC</b>   | 1.22E-03                              | 0.00E+00                             | 2.62E-05                                | -4.32E-04                                         | 4.97E-06                                       | 8.22E-04     |
| <b>EUT</b>  | 5.49E-03                              | 0.00E+00                             | 8.92E-05                                | -1.94E-03                                         | 2.24E-05                                       | 3.66E-03     |
| <b>EUf</b>  | 4.25E-05                              | 0.00E+00                             | 7.68E-09                                | -2.16E-08                                         | 2.45E-10                                       | 4.25E-05     |
| <b>EUM</b>  | 5.78E-03                              | 0.00E+00                             | 8.24E-06                                | -1.76E-04                                         | 2.02E-06                                       | 5.62E-03     |
| <b>HTC</b>  | 7.83E-10                              | 0.00E+00                             | 3.50E-11                                | -5.58E-11                                         | 6.42E-13                                       | 7.63E-10     |
| <b>HTNC</b> | 3.73E-08                              | 0.00E+00                             | 1.53E-10                                | -1.06E-09                                         | 1.22E-11                                       | 3.64E-08     |
| <b>ECFW</b> | 1.06E+00                              | 0.00E+00                             | 1.54E-02                                | -1.68E-01                                         | 1.93E-03                                       | 9.08E-01     |
| <b>LU</b>   | 8.70E+01                              | 0.00E+00                             | 1.97E-02                                | -1.78E-02                                         | 2.00E-04                                       | 8.70E+01     |
| <b>RDM</b>  | 1.20E-08                              | 0.00E+00                             | 7.37E-08                                | -7.19E-09                                         | 8.24E-11                                       | 7.85E-08     |
| <b>WU</b>   | 1.74E+01                              | 0.00E+00                             | 1.46E-01                                | -1.60E-03                                         | 9.33E-04                                       | 1.75E+01     |
| <b>RU</b>   | 1.09E+00                              | 0.00E+00                             | 5.05E-02                                | -9.60E+00                                         | 1.11E-01                                       | -8.35E+00    |
